# Supplementary material for: Childhood adiposity underlies numerous adult brain traits commonly attributed to midlife obesity
Source: PubMed Central journal article supplement (PMC11706278; doi:10.1093/brain/awae198), 2024-06-18

# Childhood Adiposity Underlies Numerous Adult Brain Traits Commonly Attributed to Midlife Obesity: A Lifecourse Mendelian Randomization Study

Scott T. Chiesa PhD<sup>1</sup>, Lydia Rader MSc<sup>2</sup>, Victoria Garfield PhD<sup>1</sup>, Isabelle Foote PhD<sup>2</sup>, Sana Suri DPhil<sup>3,4</sup>, George Davey Smith PhD<sup>5</sup>, Alun D. Hughes PhD<sup>1</sup>, and Tom G. Richardson PhD<sup>5</sup>

## TABLE OF CONTENTS

|                                                                                                                                                                                                                         |    |
|-------------------------------------------------------------------------------------------------------------------------------------------------------------------------------------------------------------------------|----|
| SUPPLEMENTAL METHODS .....                                                                                                                                                                                              | 4  |
| Brain Structural Outcomes in UKB and ABCD .....                                                                                                                                                                         | 4  |
| SUPPLEMENTAL TABLES .....                                                                                                                                                                                               | 6  |
| Supplemental Table 1: Descriptive Statistics for Exposures and Outcomes of Interest in UKB .....                                                                                                                        | 6  |
| Supplemental Table 2: Descriptive Statistics for Exposures and Outcomes of Interest in ABCD .....                                                                                                                       | 7  |
| Supplemental Table 3: MVMR Results Demonstrating Effects of Childhood and Adult Adiposity on Midlife Brain Traits .....                                                                                                 | 8  |
| Supplemental Table 4: MR Egger Intercepts and Cochran’s Q Statistics for Total Effect of Childhood Adiposity on Midlife Brain Traits .....                                                                              | 9  |
| Supplemental Table 5: Beta Estimates from Sensitivity Analyses for Total Effect of Childhood Adiposity on Midlife Brain Traits .....                                                                                    | 10 |
| Supplemental Table 6: MR Egger Intercepts and Cochran’s Q Statistics for Total Effect of Adult Adiposity on Midlife Brain Traits .....                                                                                  | 11 |
| Supplemental Table 7: Beta Estimates from Sensitivity Analyses for Total Effect of Adult Adiposity on Midlife Brain Traits .....                                                                                        | 12 |
| Supplemental Table 8: MR Egger Intercepts and Cochran’s Q Statistics for Total Effect of Childhood Adiposity on Midlife Brain Traits Without Any Form of Head Size Adjustment .....                                     | 13 |
| Supplemental Table 9: Sensitivity Analyses for Total Effect of Childhood Adiposity on Midlife Brain Traits Without Any Form of Head Size Adjustment.....                                                                | 14 |
| Supplemental Table 10: MR Egger Intercepts and Cochran’s Q Statistics for Total Effect of Adult Adiposity on Midlife Brain Traits Without Any Form of Head Size Adjustment .....                                        | 15 |
| Supplemental Table 11: Sensitivity Analyses for Total Effect of Adult Adiposity on Midlife Brain Traits Without Any Form of Head Size Adjustment .....                                                                  | 16 |
| Supplemental Table 12: MR Egger Intercepts and Cochran’s Q Statistics for Total Effect of Childhood Adiposity on Midlife Brain Traits when Outcomes Adjusted for Total Brain Volume Instead of Intracranial Volume..... | 17 |
| Supplemental Table 13: Sensitivity Analyses for Total Effect of Childhood Adiposity on Midlife Brain Traits when Outcomes Adjusted for Total Brain Volume Instead of Intracranial Volume .....                          | 18 |
| Supplemental Table 14: MR Egger Intercepts and Cochran’s Q Statistics for Total Effect of Adult Adiposity on Midlife Brain Traits when Outcomes Adjusted for Total Brain Volume Instead of Intracranial Volume.....     | 19 |
| Supplemental Table 15: Sensitivity Analyses for Total Effect of Adult Adiposity on Midlife Brain Traits when Outcomes Adjusted for Total Brain Volume Instead of Intracranial Volume .....                              | 20 |
| Supplemental Table 16: MVMR Results Demonstrating Effects of Childhood and Adult Adiposity on Midlife Brain Traits Without Any Form of Head Size Adjustment .....                                                       | 21 |

|                                                                                                                                                                                                   |    |
|---------------------------------------------------------------------------------------------------------------------------------------------------------------------------------------------------|----|
| Supplemental Table 17: MVMR Results Demonstrating Effects of Childhood and Adult Adiposity on Midlife Brain Traits when Outcomes Adjusted for Total Brain Volume Instead of Intracranial Volume . | 22 |
| Supplemental Table 18: MVMR Results Demonstrating Effects of Birthweight and Childhood Adiposity on Midlife Brain Traits .....                                                                    | 23 |
| SUPPLEMENTAL FIGURES .....                                                                                                                                                                        | 24 |
| Supplemental Figure 1: Forest Plots for Total and Direct Effects of Childhood and Adult Adiposity on Midlife Brain Traits Without Adjustment for Intracranial Volume .....                        | 24 |
| Supplemental Figure 2: Forest Plots for Total Effects of Childhood and Adult Adiposity on Midlife Brain Traits when Outcomes Adjusted for Total Brain Volume .....                                | 25 |
| Supplemental Figure 3: Funnel Plots demonstrating balance of pleiotropic effects for each brain trait in main analysis across all childhood instruments.....                                      | 26 |
| Supplemental Figure 4: Funnel Plots demonstrating balance of pleiotropic effects for each brain trait in main analysis across all adult instruments.....                                          | 27 |
| Supplemental Figure 5: Leave-one-out analyses to test for undue influence of single genetic variants which may potentially impact main analysis of childhood total effects .....                  | 28 |
| Supplemental Figure 6: Leave-one-out analyses to test for undue influence of single genetic variants which may potentially impact main analysis of adult total effects.....                       | 31 |

## SUPPLEMENTAL METHODS

### Brain Structural Outcomes in UKB and ABCD

The following image-derived phenotypes were selected from UKB to be used as outcomes in the current study: total brain volume (UKB ID# n\_25010\_2\_0; mm<sup>3</sup>); grey matter volume (UKB ID# n\_25006\_2\_0; mm<sup>3</sup>), surface area (mean of UKB ID#s n\_26721\_2\_0 and n\_26822\_2\_0; mm<sup>2</sup>), and cortical thickness (mean of UKB ID#s n\_26755\_2\_0 and n\_26856\_2\_0; mm); white matter volume (UKB ID# n\_25008\_2\_0; mm<sup>3</sup>) and hyperintensity volume (UKB ID# n\_25781\_2\_0; mm<sup>3</sup>); and subcortical volumes in the amygdala (mean of UKB ID#s n\_25021\_2\_0 and n\_25022\_2\_0; mm<sup>3</sup>), hippocampus (mean of UKB ID#s n\_25019\_2\_0 and n\_25020\_2\_0, mm<sup>3</sup>), and thalamus (mean of n\_25011\_2\_0 and n\_25012\_2\_0; mm<sup>3</sup>). White matter hyperintensities were positively skewed and so were natural log-transformed prior to inclusion in models. Intracranial volume (UKB ID# n\_26521\_2\_0; mm<sup>3</sup>) was also measured to account for maximal attained brain size in subsequent analyses, with normalized outcomes reported as outcome/ICV. In ABCD, equivalent phenotypes were chosen from baseline measured collected at age 9-10 years to match those measured in UKB as closely as possible, resulting in the following phenotypes of interest: total brain volume (ABCD ID# smri\_vol\_scs\_wholeb; mm<sup>3</sup>); surface area (ABCD ID# smri\_area\_cdk\_total; mm<sup>2</sup>); cortical thickness (ABCD ID# smri\_thick\_cdk\_mean; mm) and sulcal depth (ABCD ID# smri\_sulc\_cdk\_mean; mm); white matter hypointensity volume (ABCD ID# smri\_vol\_scs\_wmhint; mm<sup>3</sup>); and subcortical volumes in the amygdala (mean of ABCD ID#s smri\_vol\_scs\_amygdalalh and smri\_vol\_scs\_amygdalarh; mm<sup>3</sup>), hippocampus (mean of ABCD ID#s smri\_vol\_scs\_hpuslh and smri\_vol\_scs\_hpusrh; mm<sup>3</sup>), and thalamus (mean of ABCD ID#s smri\_vol\_scs\_tplh and smri\_vol\_scs\_tprh; mm<sup>3</sup>). White matter hypointensities were positively skewed and so were natural log-transformed prior to inclusion in models. Intracranial volume (ABCD ID# smri\_vol\_scs\_intracranialv; mm<sup>3</sup>) was also measured to account for maximal attained brain size in subsequent analyses, with normalized volumes once again

reported as outcome/ICV. All outcomes were converted to z-scores prior to analysis to allow direct comparisons of effect sizes across different traits.

## SUPPLEMENTAL TABLES

**Supplemental Table 1: Descriptive Statistics for Exposures and Outcomes of Interest in UKB**

| <b>Phenotype</b>                                       | <b>Mean <math>\pm</math> SD or (%)</b> |
|--------------------------------------------------------|----------------------------------------|
| Age (years)                                            | 54.9 $\pm$ 7.5                         |
| Sex (% female)                                         | 47                                     |
| BMI (kg/m <sup>2</sup> )                               | 26.6 $\pm$ 4.2                         |
| Total Brain Volume (mm <sup>3</sup> )                  | 1156706 $\pm$ 111554                   |
| Grey Matter Volume (mm <sup>3</sup> )                  | 612847 $\pm$ 55945                     |
| Cortical Surface Area (mm <sup>2</sup> )               | 168650 $\pm$ 15572                     |
| Cortical Thickness (mm)                                | 2.7 $\pm$ 0.1                          |
| White Matter Volume (mm <sup>3</sup> )                 | 543858 $\pm$ 61565                     |
| White Matter Hypointensities Volume (mm <sup>3</sup> ) | 5172 $\pm$ 6781                        |
| Hippocampus Volume (mm <sup>3</sup> )                  | 3818 $\pm$ 446                         |
| Amygdala Volume (mm <sup>3</sup> )                     | 1243 $\pm$ 218                         |
| Thalamus Volume (mm <sup>3</sup> )                     | 7626 $\pm$ 746                         |
| Intracranial Volume (mm <sup>3</sup> )                 | 1546236 $\pm$ 153509                   |

**Supplemental Table 2: Descriptive Statistics for Exposures and Outcomes of Interest in ABCD**

| <b>Phenotype</b>                                       | <b>Mean <math>\pm</math> SD or (%)</b> |
|--------------------------------------------------------|----------------------------------------|
| Age (years)                                            | 9.9 $\pm$ 0.6                          |
| Sex (% female)                                         | 47                                     |
| BMI (kg/m <sup>2</sup> )                               | 18.2 $\pm$ 3.6                         |
| BMI-CDC (z-score)                                      | 0.3 $\pm$ 1.1                          |
| Total Brain Volume (mm <sup>3</sup> )                  | 1244904 $\pm$ 847476                   |
| Cortical Surface Area (mm <sup>2</sup> )               | 192653 $\pm$ 17672                     |
| Cortical Thickness (mm)                                | 2.7 $\pm$ 0.1                          |
| Sulcal Depth (mm)                                      | -0.01 $\pm$ 0.01                       |
| White Matter Hypointensities Volume (mm <sup>3</sup> ) | 865 $\pm$ 632                          |
| Hippocampus Volume (mm <sup>3</sup> )                  | 4148 $\pm$ 386                         |
| Amygdala Volume (mm <sup>3</sup> )                     | 1805 $\pm$ 214                         |
| Thalamus Volume (mm <sup>3</sup> )                     | 7643 $\pm$ 706                         |
| Intracranial Volume (mm <sup>3</sup> )                 | 1513770 $\pm$ 140504                   |

**Supplemental Table 3: MVMR Results Demonstrating Effects of Childhood and Adult Adiposity on Midlife Brain Traits**

| <b>Outcome</b>                | <b>Age</b> | <b>Beta</b> | <b>SE</b> | <b>p</b> |
|-------------------------------|------------|-------------|-----------|----------|
| Total Volume                  | Childhood  | -0.19       | 0.06      | 0.001    |
| Total Volume                  | Adult      | 0.01        | 0.05      | 0.9      |
| Grey Matter Volume            | Childhood  | -0.12       | 0.05      | 0.03     |
| Grey Matter Volume            | Adult      | -0.07       | 0.05      | 0.1      |
| Cortical Surface Area         | Childhood  | -0.13       | 0.07      | 0.06     |
| Cortical Surface Area         | Adult      | -0.15       | 0.06      | 0.013    |
| Cortical Thickness            | Childhood  | 0.06        | 0.06      | 0.3      |
| Cortical Thickness            | Adult      | 0.00        | 0.05      | 1.0      |
| White Matter Volume           | Childhood  | -0.19       | 0.07      | 0.004    |
| White Matter Volume           | Adult      | 0.10        | 0.06      | 0.09     |
| White Matter Hyperintensities | Childhood  | -0.20       | 0.06      | 9.54E-04 |
| White Matter Hyperintensities | Adult      | 0.29        | 0.05      | 1.36E-08 |
| Amygdala                      | Childhood  | -0.06       | 0.06      | 0.3      |
| Amygdala                      | Adult      | -0.01       | 0.05      | 0.8      |
| Hippocampus                   | Childhood  | -0.21       | 0.06      | 6.02E-04 |
| Hippocampus                   | Adult      | 0.12        | 0.05      | 0.027    |
| Thalamus                      | Childhood  | -0.28       | 0.06      | 1.78E-05 |
| Thalamus                      | Adult      | 0.03        | 0.06      | 0.6      |



**Supplemental Table 4: MR Egger Intercepts and Cochran's Q Statistics for Total Effect of Childhood Adiposity on Midlife Brain Traits**

| <b>Outcome</b>                | <b>MR Egger Intercept</b> | <b>p</b> | <b>Cochran's Q</b> | <b>p</b> |
|-------------------------------|---------------------------|----------|--------------------|----------|
| Total Brain Volume            | 0.001                     | 0.4      | 391                | <0.001   |
| Grey Matter Volume            | 0.001                     | 0.3      | 366                | <0.001   |
| Cortical Surface Area         | 0.000                     | 0.8      | 538                | <0.001   |
| Cortical Thickness            | 0.001                     | 0.6      | 426                | <0.001   |
| White Matter Volume           | 0.001                     | 0.6      | 440                | <0.001   |
| White Matter Hyperintensities | 0.001                     | 0.5      | 514                | <0.001   |
| Hippocampus                   | -0.001                    | 0.7      | 431                | <0.001   |
| Amygdala                      | 0.000                     | 0.9      | 332                | 0.003    |
| Thalamus                      | 0.000                     | 0.9      | 452                | <0.001   |

**Supplemental Table 5: Beta Estimates from Sensitivity Analyses for Total Effect of Childhood Adiposity on Midlife Brain Traits**

| <b>Outcome</b>                | <b>No. SNPs</b> | <b>Method</b>             | <b>Beta</b> | <b>SE</b> | <b>p</b> |
|-------------------------------|-----------------|---------------------------|-------------|-----------|----------|
| Total Brain Volume            | 266             | Inverse variance weighted | -0.21       | 0.04      | 1.14E-07 |
| Total Brain Volume            | 266             | MR Egger                  | -0.29       | 0.09      | 0.001    |
| Total Brain Volume            | 266             | Weighted median           | -0.22       | 0.06      | 1.01E-04 |
| Total Brain Volume            | 266             | Weighted mode             | -0.29       | 0.09      | 8.06E-04 |
| Grey Matter Volume            | 266             | Inverse variance weighted | -0.17       | 0.04      | 2.04E-06 |
| Grey Matter Volume            | 266             | MR Egger                  | -0.24       | 0.08      | 0.003    |
| Grey Matter Volume            | 266             | Weighted median           | -0.20       | 0.06      | 2.58E-04 |
| Grey Matter Volume            | 266             | Weighted mode             | -0.25       | 0.08      | 2.21E-03 |
| Cortical Surface Area         | 266             | Inverse variance weighted | -0.25       | 0.05      | 3.10E-06 |
| Cortical Surface Area         | 266             | MR Egger                  | -0.21       | 0.12      | 0.07     |
| Cortical Surface Area         | 266             | Weighted median           | -0.27       | 0.07      | 8.83E-05 |
| Cortical Surface Area         | 266             | Weighted mode             | -0.30       | 0.13      | 0.02     |
| Cortical Thickness            | 266             | Inverse variance weighted | 0.07        | 0.04      | 0.1      |
| Cortical Thickness            | 266             | MR Egger                  | 0.02        | 0.10      | 0.8      |
| Cortical Thickness            | 266             | Weighted median           | 0.06        | 0.07      | 0.3      |
| Cortical Thickness            | 266             | Weighted mode             | 0.01        | 0.10      | 0.9      |
| White Matter Volume           | 266             | Inverse variance weighted | -0.16       | 0.05      | 4.95E-04 |
| White Matter Volume           | 266             | MR Egger                  | -0.21       | 0.11      | 0.05     |
| White Matter Volume           | 266             | Weighted median           | -0.21       | 0.07      | 0.002    |
| White Matter Volume           | 266             | Weighted mode             | -0.19       | 0.09      | 0.04     |
| White Matter Hyperintensities | 266             | Inverse variance weighted | -0.01       | 0.05      | 0.8      |
| White Matter Hyperintensities | 266             | MR Egger                  | -0.08       | 0.10      | 0.4      |
| White Matter Hyperintensities | 266             | Weighted median           | -0.01       | 0.06      | 0.9      |
| White Matter Hyperintensities | 266             | Weighted mode             | 0.00        | 0.07      | 1.0      |
| Hippocampus                   | 266             | Inverse variance weighted | -0.15       | 0.05      | 0.001    |
| Hippocampus                   | 266             | MR Egger                  | -0.11       | 0.10      | 0.3      |
| Hippocampus                   | 266             | Weighted median           | -0.15       | 0.07      | 0.02     |
| Hippocampus                   | 266             | Weighted mode             | -0.11       | 0.09      | 0.2      |
| Amygdala                      | 266             | Inverse variance weighted | -0.07       | 0.04      | 0.1      |
| Amygdala                      | 266             | MR Egger                  | -0.06       | 0.10      | 0.5      |
| Amygdala                      | 266             | Weighted median           | -0.10       | 0.07      | 0.1      |
| Amygdala                      | 266             | Weighted mode             | -0.14       | 0.10      | 0.1      |
| Thalamus                      | 266             | Inverse variance weighted | -0.28       | 0.05      | 1.17E-09 |
| Thalamus                      | 266             | MR Egger                  | -0.29       | 0.10      | 0.005    |
| Thalamus                      | 266             | Weighted median           | -0.20       | 0.06      | 0.001    |
| Thalamus                      | 266             | Weighted mode             | -0.19       | 0.09      | 0.03     |

**Supplemental Table 6: MR Egger Intercepts and Cochran's Q Statistics for Total Effect of Adult Adiposity on Midlife Brain Traits**

| <b>Outcome</b>                | <b>MR Egger Intercept</b> | <b>p</b> | <b>Cochran's Q</b> | <b>p</b> |
|-------------------------------|---------------------------|----------|--------------------|----------|
| Total Brain Volume            | 0.002                     | 0.2      | 811                | <0.001   |
| Grey Matter Volume            | 0.001                     | 0.5      | 806                | <0.001   |
| Cortical Surface Area         | 0.001                     | 0.8      | 900                | <0.001   |
| Cortical Thickness            | 0.000                     | 0.8      | 856                | <0.001   |
| White Matter Volume           | 0.002                     | 0.2      | 822                | <0.001   |
| White Matter Hyperintensities | 0.002                     | 0.1      | 775                | <0.001   |
| Hippocampus                   | 0.002                     | 0.1      | 719                | <0.001   |
| Amygdala                      | 0.000                     | 0.9      | 622                | <0.001   |
| Thalamus                      | 0.003                     | 0.07     | 874                | <0.001   |

**Supplemental Table 7: Beta Estimates from Sensitivity Analyses for Total Effect of Adult Adiposity on Midlife Brain Traits**

| <b>Outcome</b>                | <b>No. SNPs</b> | <b>Method</b>             | <b>Beta</b> | <b>SE</b> | <b>p</b> |
|-------------------------------|-----------------|---------------------------|-------------|-----------|----------|
| Total Brain Volume            | 470             | Inverse variance weighted | -0.09       | 0.04      | 9.91E-03 |
| Total Brain Volume            | 470             | MR Egger                  | -0.23       | 0.11      | 0.03     |
| Total Brain Volume            | 470             | Weighted median           | -0.14       | 0.05      | 0.005    |
| Total Brain Volume            | 470             | Weighted mode             | -0.21       | 0.13      | 0.1      |
| Grey Matter Volume            | 470             | Inverse variance weighted | -0.12       | 0.03      | 3.32E-04 |
| Grey Matter Volume            | 470             | MR Egger                  | -0.18       | 0.10      | 0.06     |
| Grey Matter Volume            | 470             | Weighted median           | -0.15       | 0.05      | 0.002    |
| Grey Matter Volume            | 470             | Weighted mode             | -0.21       | 0.10      | 0.03     |
| Cortical Surface Area         | 470             | Inverse variance weighted | -0.21       | 0.04      | 7.31E-07 |
| Cortical Surface Area         | 470             | MR Egger                  | -0.25       | 0.13      | 0.05     |
| Cortical Surface Area         | 470             | Weighted median           | -0.18       | 0.06      | 9.29E-04 |
| Cortical Surface Area         | 470             | Weighted mode             | -0.17       | 0.14      | 0.2      |
| Cortical Thickness            | 470             | Inverse variance weighted | 0.03        | 0.04      | 0.4      |
| Cortical Thickness            | 470             | MR Egger                  | 0.01        | 0.11      | 0.92     |
| Cortical Thickness            | 470             | Weighted median           | 0.07        | 0.05      | 0.2      |
| Cortical Thickness            | 470             | Weighted mode             | 0.13        | 0.12      | 0.       |
| White Matter Volume           | 470             | Inverse variance weighted | -0.02       | 0.04      | 0.7      |
| White Matter Volume           | 470             | MR Egger                  | -0.18       | 0.12      | 0.1      |
| White Matter Volume           | 470             | Weighted median           | -0.02       | 0.05      | 0.7      |
| White Matter Volume           | 470             | Weighted mode             | -0.01       | 0.15      | 0.9      |
| White Matter Hyperintensities | 470             | Inverse variance weighted | 0.19        | 0.04      | 1.82E-07 |
| White Matter Hyperintensities | 470             | MR Egger                  | 0.04        | 0.11      | 0.7      |
| White Matter Hyperintensities | 470             | Weighted median           | 0.14        | 0.05      | 0.005    |
| White Matter Hyperintensities | 470             | Weighted mode             | 0.11        | 0.10      | 0.2      |
| Hippocampus                   | 470             | Inverse variance weighted | 0.00        | 0.04      | 1.0      |
| Hippocampus                   | 470             | MR Egger                  | -0.17       | 0.11      | 0.1      |
| Hippocampus                   | 470             | Weighted median           | -0.08       | 0.06      | 0.2      |
| Hippocampus                   | 470             | Weighted mode             | -0.12       | 0.10      | 0.2      |
| Amygdala                      | 470             | Inverse variance weighted | -0.04       | 0.04      | 0.3      |
| Amygdala                      | 470             | MR Egger                  | -0.03       | 0.11      | 0.8      |
| Amygdala                      | 470             | Weighted median           | -0.11       | 0.06      | 0.04     |
| Amygdala                      | 470             | Weighted mode             | -0.22       | 0.11      | 0.06     |
| Thalamus                      | 470             | Inverse variance weighted | -0.11       | 0.04      | 4.70E-03 |
| Thalamus                      | 470             | MR Egger                  | -0.31       | 0.12      | 0.007    |
| Thalamus                      | 470             | Weighted median           | -0.14       | 0.06      | 0.01     |
| Thalamus                      | 470             | Weighted mode             | -0.15       | 0.10      | 0.1      |

**Supplemental Table 8: MR Egger Intercepts and Cochran's Q Statistics for Total Effect of Childhood Adiposity on Midlife Brain Traits Without Any Form of Head Size Adjustment**

| <b>Outcome</b>        | <b>MR Egger Intercept</b> | <b>p</b> | <b>Cochran's Q</b> | <b>p</b> |
|-----------------------|---------------------------|----------|--------------------|----------|
| Intracranial Volume   | 0.000                     | 0.7      | 584                | <0.001   |
| Total Brain Volume    | 0.000                     | 0.9      | 538                | <0.001   |
| Grey Matter Volume    | 0.000                     | 0.8      | 536                | <0.001   |
| Cortical Surface Area | -0.001                    | 0.7      | 566                | <0.001   |
| White Matter Volume   | 0.000                     | 1.0      | 513                | <0.001   |
| Hippocampus           | -0.001                    | 0.5      | 404                | <0.001   |
| Amygdala              | 0.000                     | 0.8      | 322                | <0.001   |
| Thalamus              | 0.000                     | 0.9      | 481                | <0.001   |

**Supplemental Table 9: Sensitivity Analyses for Total Effect of Childhood Adiposity on Midlife Brain Traits Without Any Form of Head Size Adjustment**

| <b>Outcome</b>        | <b>No. SNPs</b> | <b>Method</b>             | <b>Beta</b> | <b>SE</b> | <b>p</b> |
|-----------------------|-----------------|---------------------------|-------------|-----------|----------|
| Intracranial Volume   | 266             | Inverse variance weighted | 0.14        | 0.05      | 0.002    |
| Intracranial Volume   | 266             | MR Egger                  | 0.17        | 0.10      | 0.1      |
| Intracranial Volume   | 266             | Weighted median           | 0.11        | 0.06      | 0.05     |
| Intracranial Volume   | 266             | Weighted mode             | 0.10        | 0.09      | 0.3      |
| Total Brain Volume    | 266             | Inverse variance weighted | 0.05        | 0.04      | 0.2      |
| Total Brain Volume    | 266             | MR Egger                  | 0.03        | 0.10      | 0.7      |
| Total Brain Volume    | 266             | Weighted median           | -0.05       | 0.06      | 0.4      |
| Total Brain Volume    | 266             | Weighted mode             | -0.05       | 0.08      | 0.5      |
| Grey Matter Volume    | 266             | Inverse variance weighted | 0.05        | 0.04      | 0.3      |
| Grey Matter Volume    | 266             | MR Egger                  | 0.02        | 0.10      | 0.8      |
| Grey Matter Volume    | 266             | Weighted median           | -0.05       | 0.06      | 0.4      |
| Grey Matter Volume    | 266             | Weighted mode             | -0.10       | 0.08      | 0.2      |
| Cortical Surface Area | 266             | Inverse variance weighted | 0.02        | 0.04      | 0.7      |
| Cortical Surface Area | 266             | MR Egger                  | 0.05        | 0.10      | 0.6      |
| Cortical Surface Area | 266             | Weighted median           | 0.02        | 0.06      | 0.8      |
| Cortical Surface Area | 266             | Weighted mode             | -0.01       | 0.08      | 0.9      |
| White Matter Volume   | 266             | Inverse variance weighted | 0.07        | 0.04      | 0.1      |
| White Matter Volume   | 266             | MR Egger                  | 0.02        | 0.10      | 0.8      |
| White Matter Volume   | 266             | Weighted median           | 0.06        | 0.07      | 0.3      |
| White Matter Volume   | 266             | Weighted mode             | 0.01        | 0.10      | 0.9      |
| Hippocampus           | 266             | Inverse variance weighted | 0.05        | 0.04      | 0.2      |
| Hippocampus           | 266             | MR Egger                  | 0.05        | 0.10      | 0.6      |
| Hippocampus           | 266             | Weighted median           | 0.04        | 0.06      | 0.6      |
| Hippocampus           | 266             | Weighted mode             | 0.00        | 0.08      | 1.0      |
| Amygdala              | 266             | Inverse variance weighted | -0.01       | 0.05      | 0.8      |
| Amygdala              | 266             | MR Egger                  | -0.08       | 0.10      | 0.4      |
| Amygdala              | 266             | Weighted median           | -0.01       | 0.06      | 0.9      |
| Amygdala              | 266             | Weighted mode             | 0.00        | 0.07      | 1.0      |
| Thalamus              | 266             | Inverse variance weighted | -0.03       | 0.04      | 0.5      |
| Thalamus              | 266             | MR Egger                  | 0.03        | 0.10      | 0.8      |
| Thalamus              | 266             | Weighted median           | -0.11       | 0.06      | 0.08     |
| Thalamus              | 266             | Weighted mode             | -0.08       | 0.09      | 0.3      |

**Supplemental Table 10: MR Egger Intercepts and Cochran's Q Statistics for Total Effect of Adult Adiposity on Midlife Brain Traits Without Any Form of Head Size Adjustment**

| <b>Outcome</b>        | <b>MR Egger Intercept</b> | <b>p</b> | <b>Cochran's Q</b> | <b>p</b> |
|-----------------------|---------------------------|----------|--------------------|----------|
| Intracranial Volume   | -0.001                    | 0.4      | 947                | <0.001   |
| Total Brain Volume    | 0.000                     | 0.8      | 943                | <0.001   |
| Grey Matter Volume    | -0.001                    | 0.7      | 905                | <0.001   |
| Cortical Surface Area | -0.001                    | 0.5      | 955                | <0.001   |
| White Matter Volume   | 0.000                     | 1.0      | 940                | <0.001   |
| Hippocampus           | 0.001                     | 0.4      | 782                | <0.001   |
| Amygdala              | -0.001                    | 0.6      | 681                | <0.001   |
| Thalamus              | 0.001                     | 0.4      | 920                | <0.001   |

**Supplemental Table 11: Sensitivity Analyses for Total Effect of Adult Adiposity on Midlife Brain Traits Without Any Form of Head Size Adjustment**

| <b>Outcome</b>        | <b>No. SNPs</b> | <b>Method</b>             | <b>Beta</b> | <b>SE</b> | <b>p</b> |
|-----------------------|-----------------|---------------------------|-------------|-----------|----------|
| Intracranial Volume   | 470             | Inverse variance weighted | 0.01        | 0.04      | 0.8      |
| Intracranial Volume   | 470             | MR Egger                  | 0.09        | 0.11      | 0.       |
| Intracranial Volume   | 470             | Weighted median           | 0.02        | 0.05      | 0.7      |
| Intracranial Volume   | 470             | Weighted mode             | 0.01        | 0.10      | 0.9      |
| Total Brain Volume    | 470             | Inverse variance weighted | -0.03       | 0.04      | 0.4      |
| Total Brain Volume    | 470             | MR Egger                  | -0.01       | 0.11      | 0.9      |
| Total Brain Volume    | 470             | Weighted median           | -0.05       | 0.05      | 0.3      |
| Total Brain Volume    | 470             | Weighted mode             | -0.03       | 0.09      | 0.8      |
| Grey Matter Volume    | 470             | Inverse variance weighted | -0.07       | 0.04      | 0.06     |
| Grey Matter Volume    | 470             | MR Egger                  | -0.03       | 0.11      | 0.8      |
| Grey Matter Volume    | 470             | Weighted median           | -0.09       | 0.05      | 0.06     |
| Grey Matter Volume    | 470             | Weighted mode             | -0.07       | 0.09      | 0.5      |
| Cortical Surface Area | 470             | Inverse variance weighted | -0.11       | 0.04      | 0.004    |
| Cortical Surface Area | 470             | MR Egger                  | -0.04       | 0.11      | 0.7      |
| Cortical Surface Area | 470             | Weighted median           | -0.10       | 0.05      | 0.05     |
| Cortical Surface Area | 470             | Weighted mode             | -0.02       | 0.09      | 0.8      |
| White Matter Volume   | 470             | Inverse variance weighted | 0.03        | 0.04      | 0.3      |
| White Matter Volume   | 470             | MR Egger                  | 0.01        | 0.11      | 0.9      |
| White Matter Volume   | 470             | Weighted median           | 0.07        | 0.05      | 0.2      |
| White Matter Volume   | 470             | Weighted mode             | 0.13        | 0.12      | 0.3      |
| Hippocampus           | 470             | Inverse variance weighted | 0.00        | 0.04      | 1.0      |
| Hippocampus           | 470             | MR Egger                  | 0.00        | 0.11      | 1.0      |
| Hippocampus           | 470             | Weighted median           | 0.04        | 0.05      | 0.4      |
| Hippocampus           | 470             | Weighted mode             | 0.02        | 0.09      | 0.8      |
| Amygdala              | 470             | Inverse variance weighted | 0.19        | 0.04      | 1.82E-07 |
| Amygdala              | 470             | MR Egger                  | 0.04        | 0.11      | 0.7      |
| Amygdala              | 470             | Weighted median           | 0.14        | 0.05      | 0.005    |
| Amygdala              | 470             | Weighted mode             | 0.11        | 0.10      | 0.2      |
| Thalamus              | 470             | Inverse variance weighted | 0.00        | 0.04      | 0.9      |
| Thalamus              | 470             | MR Egger                  | -0.09       | 0.11      | 0.4      |
| Thalamus              | 470             | Weighted median           | -0.10       | 0.05      | 0.05     |
| Thalamus              | 470             | Weighted mode             | -0.20       | 0.12      | 0.09     |



**Supplemental Table 12: MR Egger Intercepts and Cochran's Q Statistics for Total Effect of Childhood Adiposity on Midlife Brain Traits when Outcomes Adjusted for Total Brain Volume Instead of Intracranial Volume**

| <b>Outcome</b>        | <b>MR Egger Intercept</b> | <b>p</b> | <b>Cochran's Q</b> | <b>p</b> |
|-----------------------|---------------------------|----------|--------------------|----------|
| Grey Matter Volume    | 0.000                     | 0.8      | 429                | <0.001   |
| Cortical Surface Area | -0.002                    | 0.2      | 527                | <0.001   |
| White Matter Volume   | 0.000                     | 0.8      | 429                | <0.001   |
| Hippocampus           | -0.001                    | 0.4      | 390                | <0.001   |
| Amygdala              | 0.000                     | 0.7      | 323                | <0.001   |
| Thalamus              | -0.001                    | 0.7      | 450                | <0.001   |

**Supplemental Table 13: Sensitivity Analyses for Total Effect of Childhood Adiposity on Midlife Brain Traits when Outcomes Adjusted for Total Brain Volume Instead of Intracranial Volume**

| <b>Outcome</b>        | <b>No. SNPs</b> | <b>Method</b>             | <b>Beta</b> | <b>SE</b> | <b>p</b> |
|-----------------------|-----------------|---------------------------|-------------|-----------|----------|
| Grey Matter Volume    | 266             | Inverse variance weighted | -0.01       | 0.04      | 0.7      |
| Grey Matter Volume    | 266             | MR Egger                  | -0.03       | 0.10      | 0.7      |
| Grey Matter Volume    | 266             | Weighted median           | -0.05       | 0.06      | 0.4      |
| Grey Matter Volume    | 266             | Weighted mode             | -0.10       | 0.09      | 0.3      |
| Cortical Surface Area | 266             | Inverse variance weighted | -0.08       | 0.05      | 0.1      |
| Cortical Surface Area | 266             | MR Egger                  | 0.04        | 0.11      | 0.7      |
| Cortical Surface Area | 266             | Weighted median           | -0.08       | 0.07      | 0.3      |
| Cortical Surface Area | 266             | Weighted mode             | -0.05       | 0.12      | 0.6      |
| White Matter Volume   | 266             | Inverse variance weighted | 0.01        | 0.04      | 0.7      |
| White Matter Volume   | 266             | MR Egger                  | 0.03        | 0.10      | 0.7      |
| White Matter Volume   | 266             | Weighted median           | 0.05        | 0.06      | 0.4      |
| White Matter Volume   | 266             | Weighted mode             | 0.10        | 0.09      | 0.3      |
| Hippocampus           | 266             | Inverse variance weighted | -0.08       | 0.04      | 0.07     |
| Hippocampus           | 266             | MR Egger                  | 0.00        | 0.10      | 1.0      |
| Hippocampus           | 266             | Weighted median           | -0.09       | 0.07      | 0.2      |
| Hippocampus           | 266             | Weighted mode             | -0.05       | 0.10      | 0.5      |
| Amygdala              | 266             | Inverse variance weighted | -0.01       | 0.04      | 0.8      |
| Amygdala              | 266             | MR Egger                  | 0.02        | 0.09      | 0.9      |
| Amygdala              | 266             | Weighted median           | -0.04       | 0.07      | 0.6      |
| Amygdala              | 266             | Weighted mode             | -0.07       | 0.10      | 0.5      |
| Thalamus              | 266             | Inverse variance weighted | -0.21       | 0.05      | 1.07E-05 |
| Thalamus              | 266             | MR Egger                  | -0.17       | 0.11      | 0.1      |
| Thalamus              | 266             | Weighted median           | -0.19       | 0.07      | 0.006    |
| Thalamus              | 266             | Weighted mode             | -0.11       | 0.09      | 0.2      |

**Supplemental Table 14: MR Egger Intercepts and Cochran's Q Statistics for Total Effect of Adult Adiposity on Midlife Brain Traits when Outcomes Adjusted for Total Brain Volume Instead of Intracranial Volume**

| <b>Outcome</b>        | <b>MR Egger Intercept</b> | <b>p</b> | <b>Cochran's Q</b> | <b>p</b> |
|-----------------------|---------------------------|----------|--------------------|----------|
| Grey Matter Volume    | -0.001                    | 0.5      | 819                | <0.001   |
| Cortical Surface Area | -0.001                    | 0.4      | 968                | <0.001   |
| White Matter Volume   | 0.001                     | 0.5      | 819                | <0.001   |
| Hippocampus           | 0.002                     | 0.2      | 688                | <0.001   |
| Amygdala              | -0.001                    | 0.7      | 626                | <0.001   |
| Thalamus              | 0.002                     | 0.1      | 808                | <0.001   |

**Supplemental Table 15: Sensitivity Analyses for Total Effect of Adult Adiposity on Midlife Brain Traits when Outcomes Adjusted for Total Brain Volume Instead of Intracranial Volume**

| <b>Outcome</b>        | <b>NoSNPs</b> | <b>Method</b>             | <b>Beta</b> | <b>SE</b> | <b>p</b> |
|-----------------------|---------------|---------------------------|-------------|-----------|----------|
| Grey Matter Volume    | 470           | Inverse variance weighted | -0.09       | 0.04      | 0.0      |
| Grey Matter Volume    | 470           | MR Egger                  | -0.01       | 0.11      | 0.9      |
| Grey Matter Volume    | 470           | Weighted median           | -0.13       | 0.05      | 0.008    |
| Grey Matter Volume    | 470           | Weighted mode             | -0.18       | 0.10      | 0.08     |
| Cortical Surface Area | 470           | Inverse variance weighted | -0.17       | 0.04      | 7.03E-05 |
| Cortical Surface Area | 470           | MR Egger                  | -0.08       | 0.13      | 0.5      |
| Cortical Surface Area | 470           | Weighted median           | -0.13       | 0.06      | 0.03     |
| Cortical Surface Area | 470           | Weighted mode             | -0.15       | 0.12      | 0.2      |
| White Matter Volume   | 470           | Inverse variance weighted | 0.09        | 0.04      | 0.02     |
| White Matter Volume   | 470           | MR Egger                  | 0.01        | 0.11      | 0.9      |
| White Matter Volume   | 470           | Weighted median           | 0.13        | 0.05      | 0.009    |
| White Matter Volume   | 470           | Weighted mode             | 0.18        | 0.10      | 0.07     |
| Hippocampus           | 470           | Inverse variance weighted | 0.04        | 0.04      | 0.4      |
| Hippocampus           | 470           | MR Egger                  | -0.10       | 0.11      | 0.4      |
| Hippocampus           | 470           | Weighted median           | 0.00        | 0.06      | 1.0      |
| Hippocampus           | 470           | Weighted mode             | -0.04       | 0.11      | 0.7      |
| Amygdala              | 470           | Inverse variance weighted | -0.01       | 0.04      | 0.7      |
| Amygdala              | 470           | MR Egger                  | 0.03        | 0.11      | 0.8      |
| Amygdala              | 470           | Weighted median           | -0.08       | 0.05      | 0.1      |
| Amygdala              | 470           | Weighted mode             | -0.17       | 0.12      | 0.2      |
| Thalamus              | 470           | Inverse variance weighted | -0.08       | 0.04      | 0.05     |
| Thalamus              | 470           | MR Egger                  | -0.25       | 0.12      | 0.04     |
| Thalamus              | 470           | Weighted median           | -0.14       | 0.06      | 0.01     |
| Thalamus              | 470           | Weighted mode             | -0.14       | 0.11      | 0.2      |

**Supplemental Table 16: MVMR Results Demonstrating Effects of Childhood and Adult Adiposity on Midlife Brain Traits Without Any Form of Head Size Adjustment**

| <b>Outcome</b>                | <b>Age</b> | <b>Beta</b> | <b>SE</b> | <b>p</b> |
|-------------------------------|------------|-------------|-----------|----------|
| Intracranial Volume           | Childhood  | 0.22        | 0.061     | 3.43E-04 |
| Intracranial Volume           | Adult      | -0.10       | 0.05      | 0.052    |
| Total Volume                  | Childhood  | 0.14        | 0.06      | 0.02     |
| Total Volume                  | Adult      | -0.10       | 0.05      | 0.053    |
| Grey Matter Volume            | Childhood  | 0.16        | 0.06      | 0.006    |
| Grey Matter Volume            | Adult      | -0.15       | 0.05      | 0.003    |
| Cortical Surface Area         | Childhood  | 0.16        | 0.06      | 0.01     |
| Cortical Surface Area         | Adult      | -0.19       | 0.05      | 4.06E-04 |
| Cortical Thickness            | Childhood  | 0.06        | 0.06      | 0.3      |
| Cortical Thickness            | Adult      | 0.00        | 0.05      | 1.0      |
| White Matter Volume           | Childhood  | 0.10        | 0.06      | 0.08     |
| White Matter Volume           | Adult      | -0.04       | 0.05      | 0.4      |
| White Matter Hyperintensities | Childhood  | -0.20       | 0.06      | 9.54E-04 |
| White Matter Hyperintensities | Adult      | 0.29        | 0.05      | 1.36E-08 |
| Amygdala                      | Childhood  | 0.06        | 0.06      | 0.3      |
| Amygdala                      | Adult      | -0.07       | 0.05      | 0.2      |
| Hippocampus                   | Childhood  | -0.03       | 0.06      | 0.6      |
| Hippocampus                   | Adult      | 0.03        | 0.05      | 0.5      |
| Thalamus                      | Childhood  | -0.01       | 0.06      | 0.9      |
| Thalamus                      | Adult      | -0.07       | 0.05      | 0.2      |

**Supplemental Table 17: MVMR Results Demonstrating Effects of Childhood and Adult Adiposity on Midlife Brain Traits when Outcomes Adjusted for Total Brain Volume Instead of Intracranial Volume**

| <b>Outcome</b>        | <b>Age</b> | <b>Beta</b> | <b>SE</b> | <b>p</b> |
|-----------------------|------------|-------------|-----------|----------|
| Grey Matter Volume    | Childhood  | 0.05        | 0.06      | 0.4      |
| Grey Matter Volume    | Adult      | -0.14       | 0.05      | 0.01     |
| Cortical Surface Area | Childhood  | 0.04        | 0.07      | 0.6      |
| Cortical Surface Area | Adult      | -0.20       | 0.0       | 6.79E-04 |
| White Matter Volume   | Childhood  | -0.05       | 0.06      | 0.4      |
| White Matter Volume   | Adult      | 0.14        | 0.05      | 0.01     |
| Amygdala              | Childhood  | -0.01       | 0.06      | 0.9      |
| Amygdala              | Adult      | -0.01       | 0.05      | 0.8      |
| Hippocampus           | Childhood  | -0.16       | 0.06      | 0.009    |
| Hippocampus           | Adult      | 0.13        | 0.05      | 0.016    |
| Thalamus              | Childhood  | -0.23       | 0.07      | 6.13E-04 |
| Thalamus              | Adult      | 0.04        | 0.06      | 0.5      |

**Supplemental Table 18: MVMR Results Demonstrating Effects of Birthweight and Childhood Adiposity on Midlife Brain Traits**

| <b>Outcome</b>                | <b>Age</b>  | <b>Beta</b> | <b>SE</b> | <b>p</b> |
|-------------------------------|-------------|-------------|-----------|----------|
| Total Volume                  | Birthweight | -0.04       | 0.06      | 0.6      |
| Total Volume                  | Childhood   | -0.20       | 0.04      | 3.19E-06 |
| Grey Matter Volume            | Birthweight | -0.12       | 0.05      | 0.027    |
| Grey Matter Volume            | Childhood   | -0.17       | 0.04      | 1.58E-05 |
| Cortical Surface Area         | Birthweight | -0.07       | 0.07      | 0.4      |
| Cortical Surface Area         | Childhood   | -0.26       | 0.05      | 1.75E-06 |
| Cortical Thickness            | Birthweight | -0.01       | 0.06      | 0.8      |
| Cortical Thickness            | Childhood   | 0.07        | 0.04      | 0.1      |
| White Matter Volume           | Birthweight | 0.08        | 0.07      | 0.2      |
| White Matter Volume           | Childhood   | -0.15       | 0.05      | 0.005    |
| White Matter Hyperintensities | Birthweight | 0.08        | 0.07      | 0.2      |
| White Matter Hyperintensities | Childhood   | 0.01        | 0.05      | 0.9      |
| Amygdala                      | Birthweight | -0.26       | 0.06      | 4.69E-05 |
| Amygdala                      | Childhood   | -0.05       | 0.05      | 0.3      |
| Hippocampus                   | Birthweight | -0.21       | 0.06      | 0.001    |
| Hippocampus                   | Childhood   | -0.14       | 0.05      | 0.002    |
| Thalamus                      | Birthweight | -0.08       | 0.07      | 0.2      |
| Thalamus                      | Childhood   | -0.30       | 0.05      | 4.69E-09 |

**SUPPLEMENTAL FIGURES**

**Supplemental Figure 1: Forest Plots for Total and Direct Effects of Childhood and Adult Adiposity on Midlife Brain Traits Without Adjustment for Intracranial Volume**

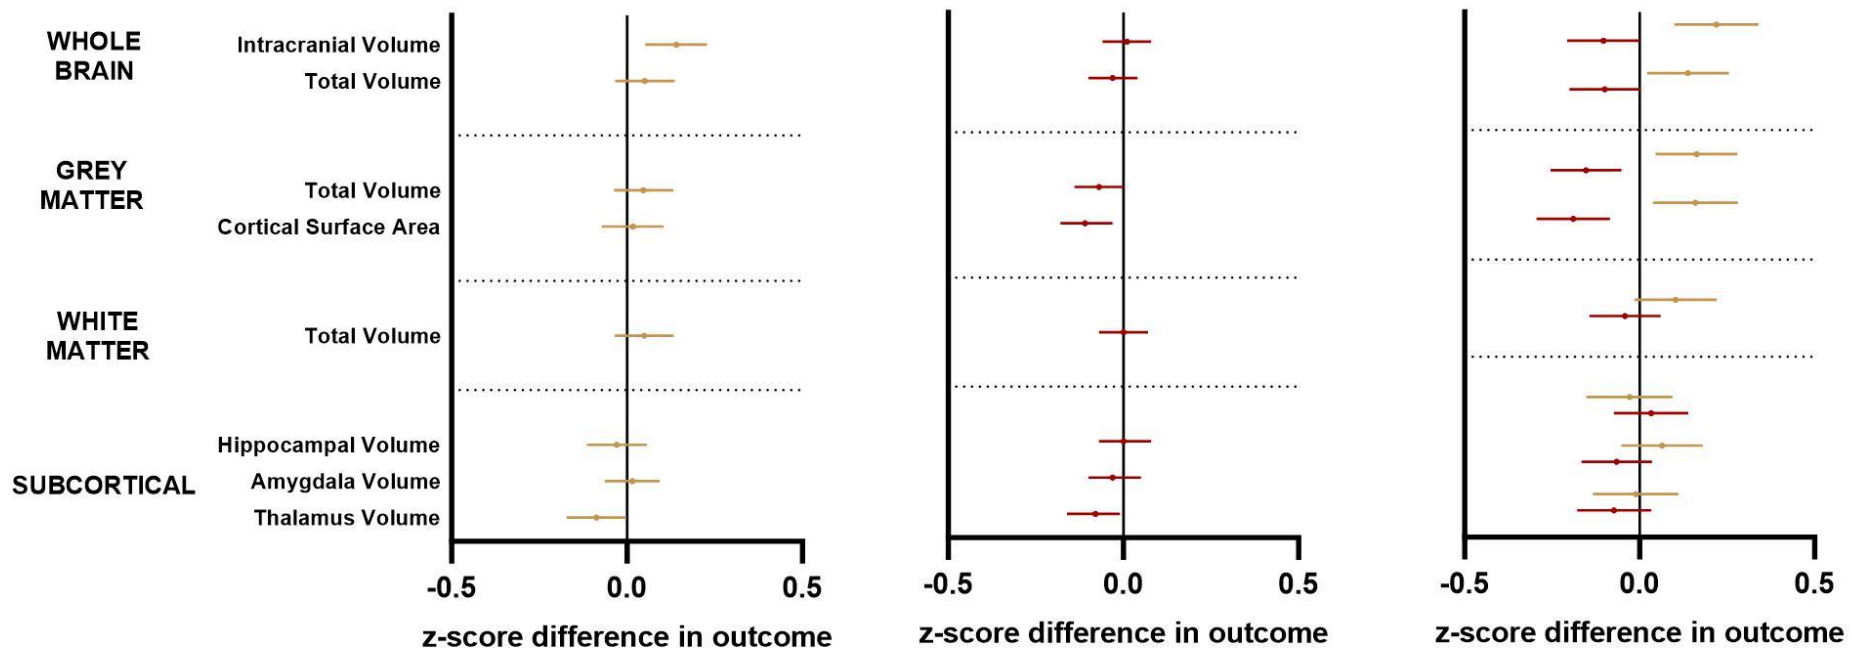



Supplemental Figure 2: Forest Plots for Total Effects of Childhood and Adult Adiposity on Midlife Brain Traits when Outcomes Adjusted for Total Brain Volume

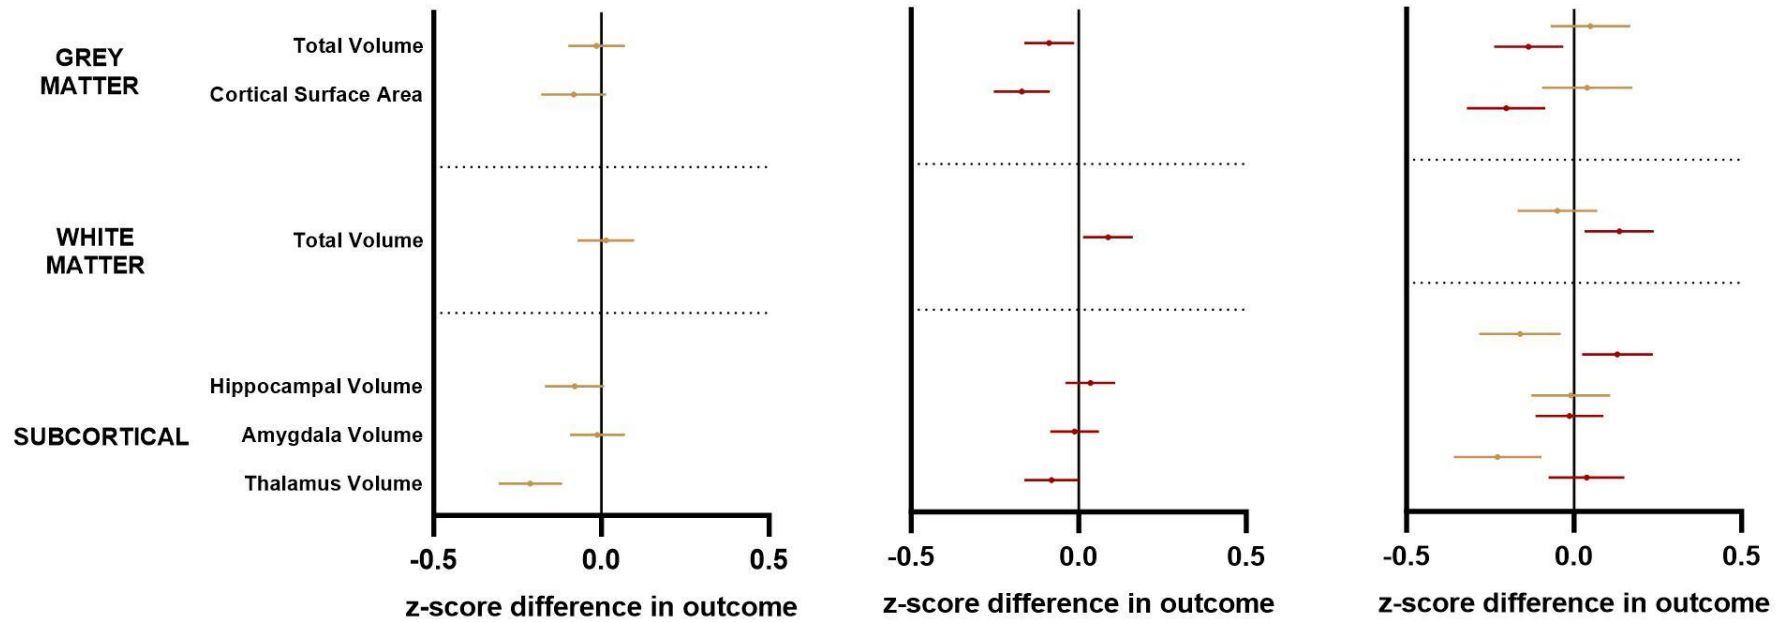

**Supplemental Figure 3: Funnel Plots Demonstrating Balance of Pleiotropic Effects for Each Brain Trait in Main Analysis Across all Childhood Instruments**

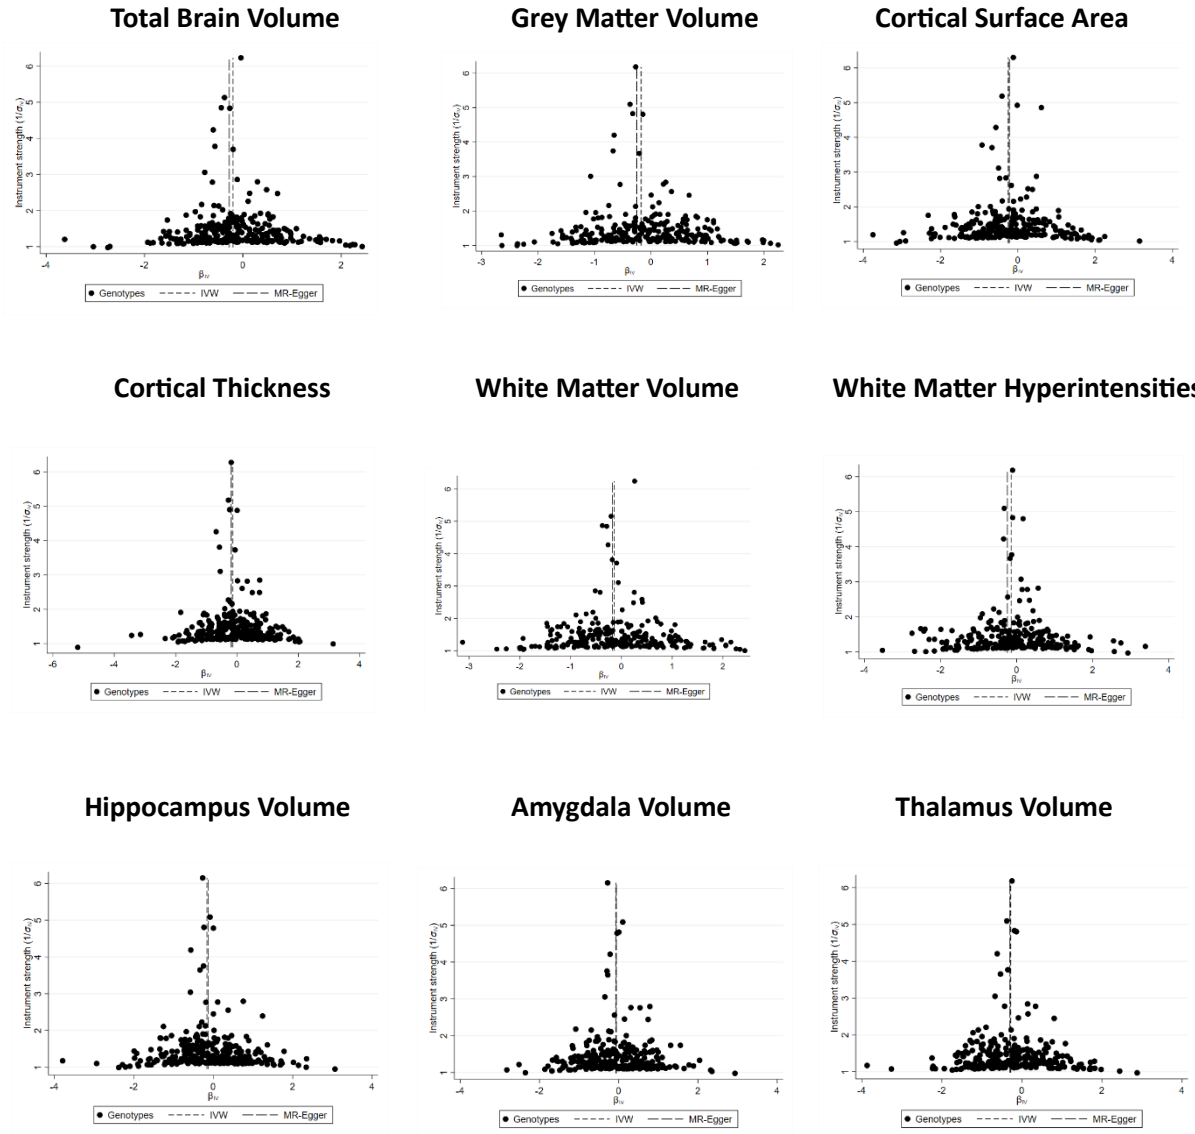

**Supplemental Figure 4: Funnel Plots Demonstrating Balance of Pleiotropic Effects for Each Brain Trait in Main Analysis Across all Adult Instruments**

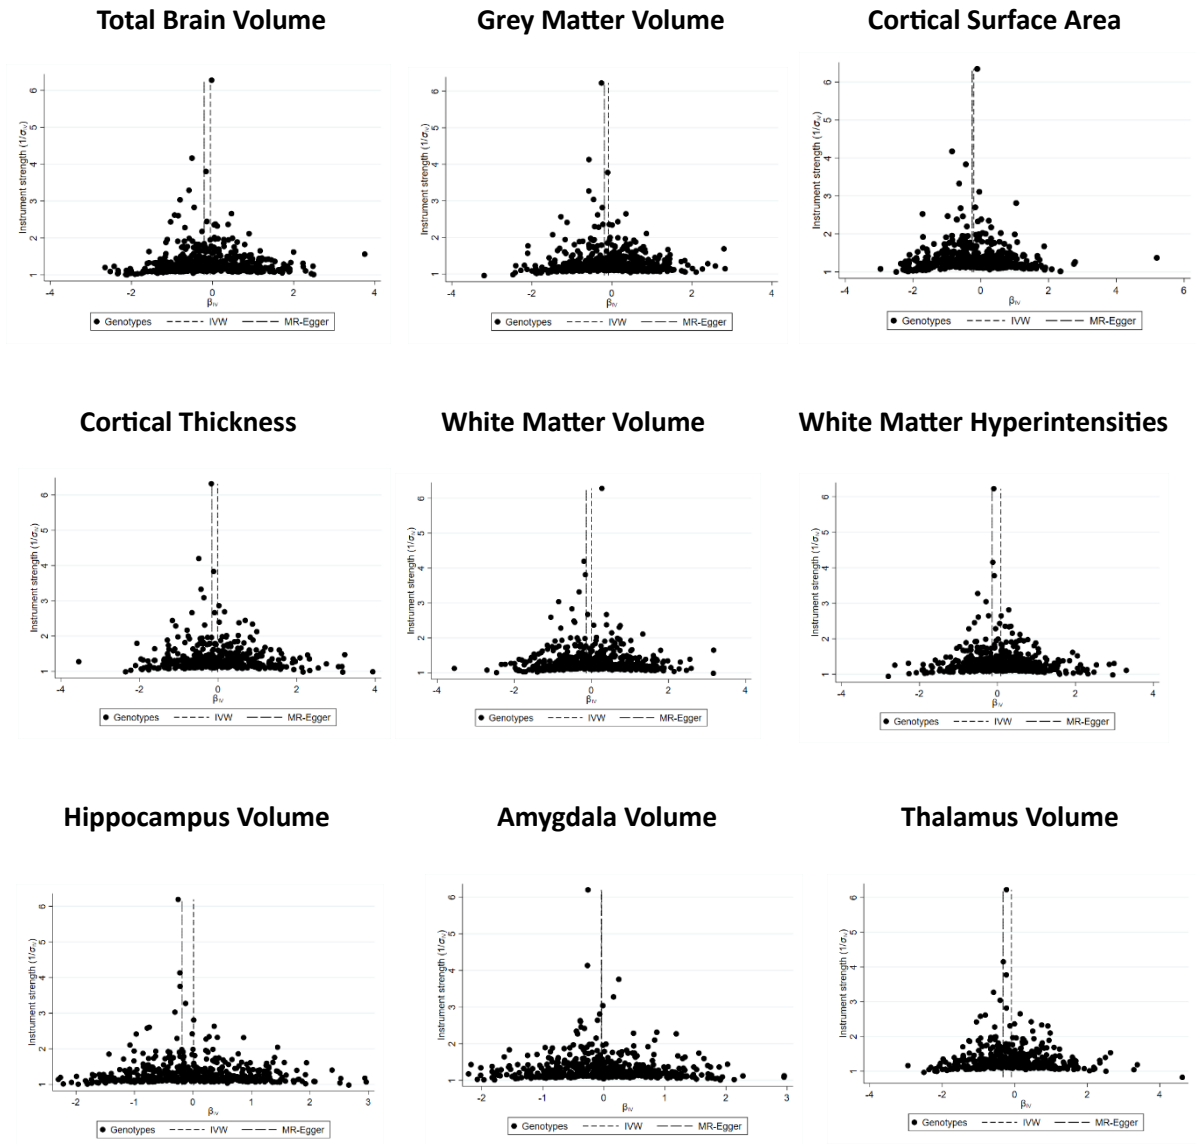

**Supplemental Figure 5: Leave-One-Out Analyses to Test for Undue Influence of Single Genetic Variants Which May Potentially Impact Main Analysis of Childhood Total Effects**

**Total Volume**

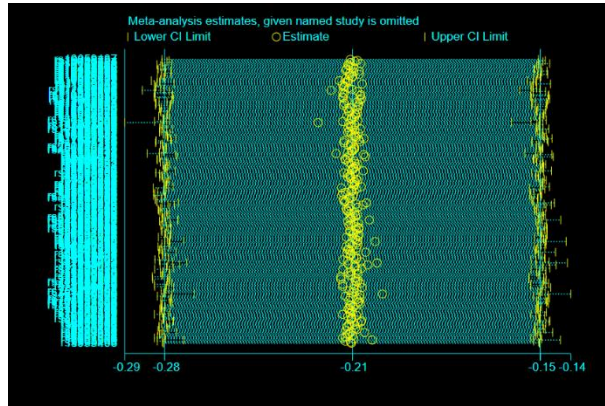

**Grey Matter Volume**

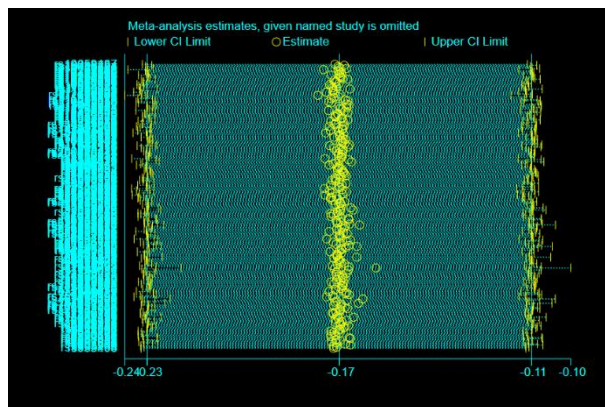

**Cortical Surface Area**

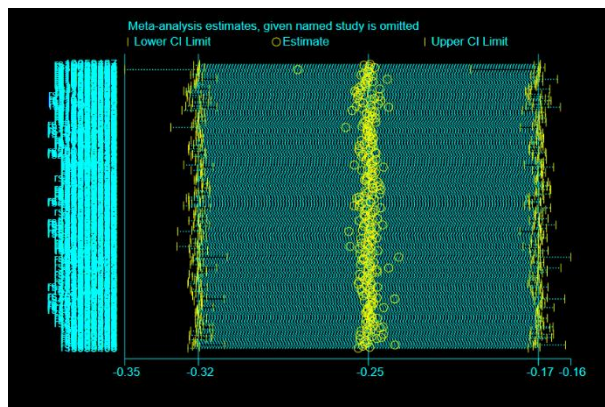

### Cortical Thickness

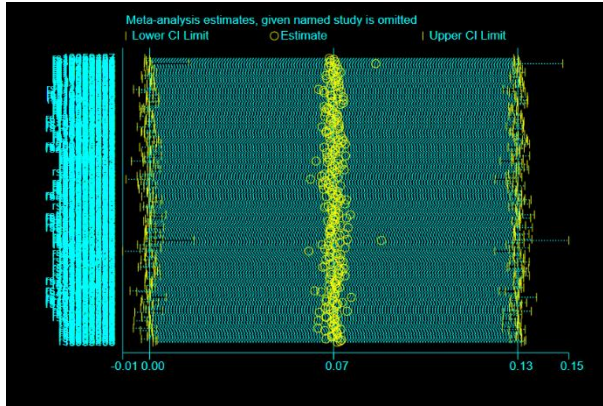

### White Matter Volume

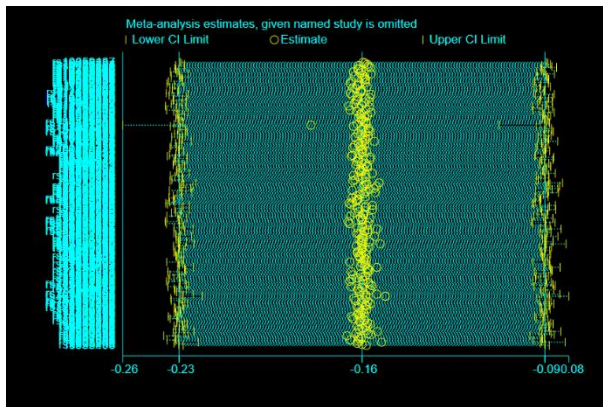

### White Matter Hyperintensities

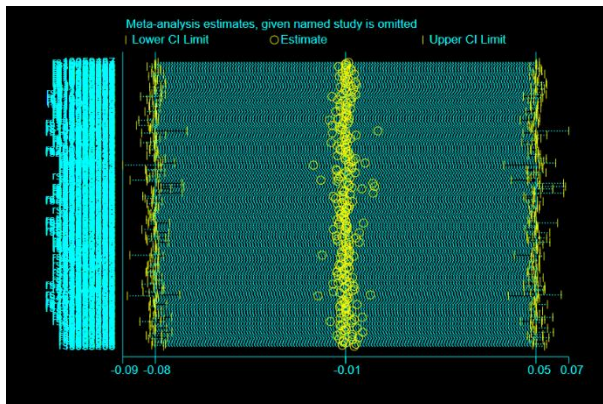



## Amygdala

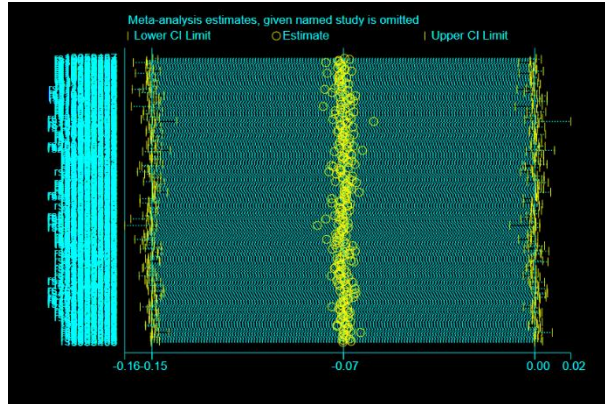

## Hippocampus

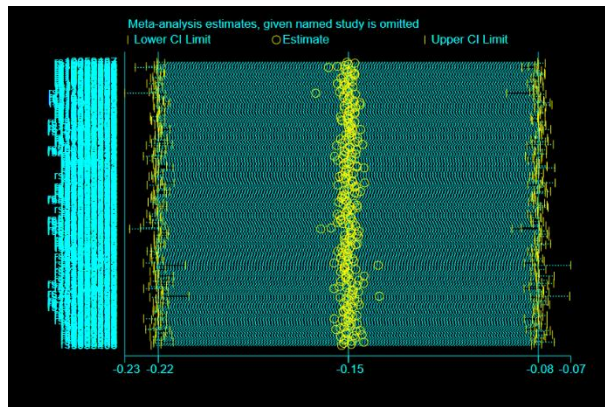

## Thalamus

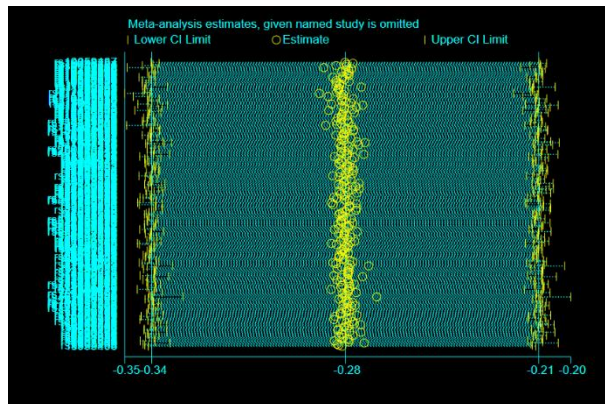

**Supplemental Figure 6: Leave-One-Out Analyses to Test for Undue Influence of Single Genetic Variants Which May Potentially Impact Main Analysis of Adult Total Effects**

**Total Brain Volume**

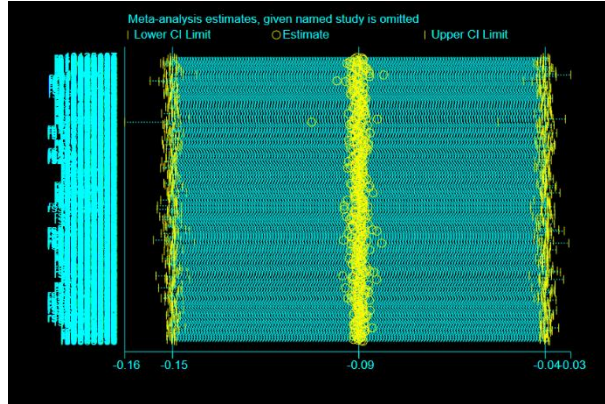

**Grey Matter Volume**

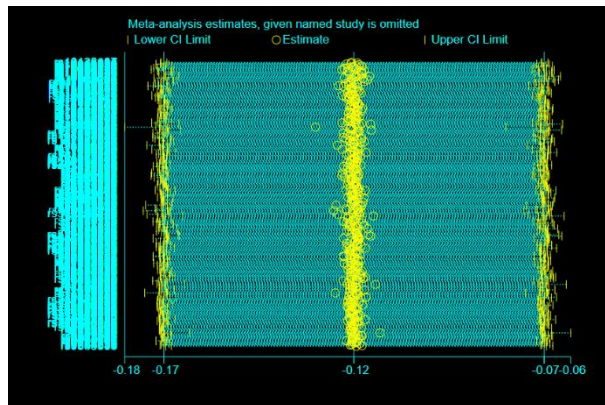

**Cortical Surface Area**

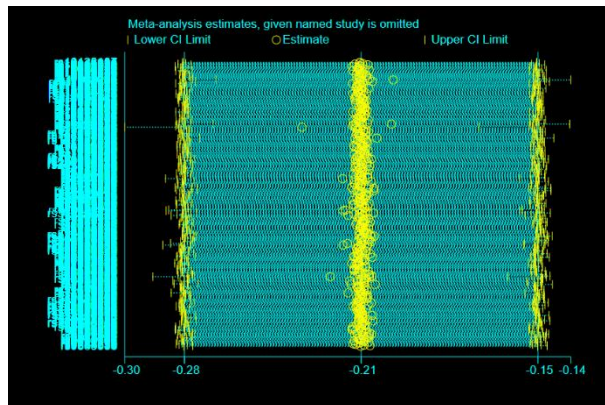

### Cortical Thickness

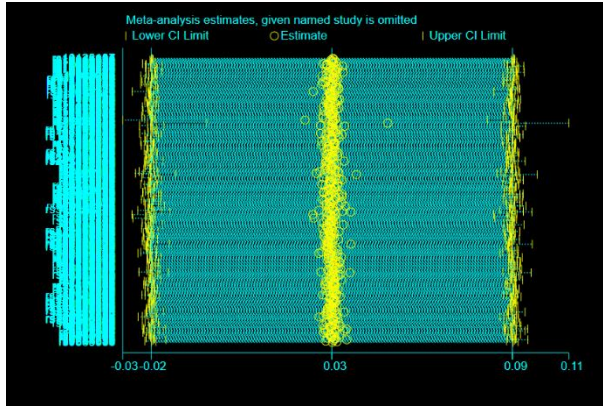

### White Matter Volume

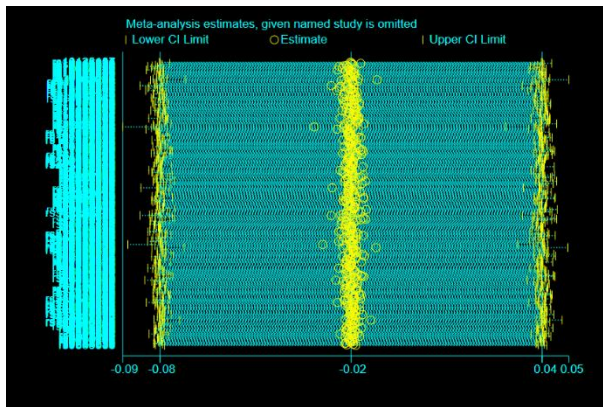

### White Matter Hyperintensities

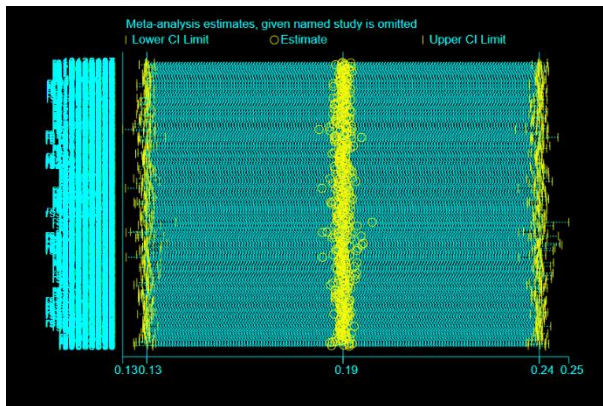



## Amygdala

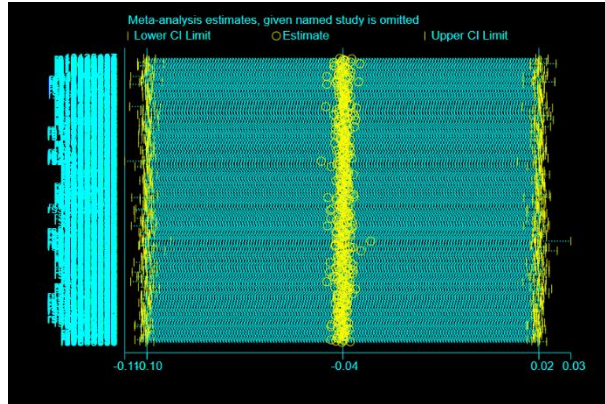

## Hippocampus

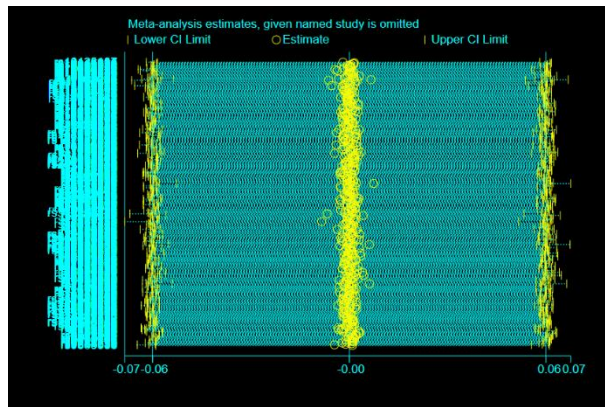

## Thalamus

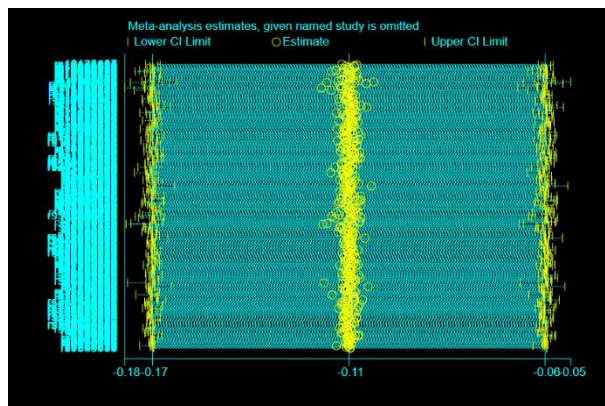

Supplement: awae198_supplementary_data.pdf [file awae198_supplementary_data.pdf]
